# Supplementary material
Source: ML conference proceedings conference paper supplement (https://proceedings.neurips.cc/paper_files/paper/2020/hash/52d2752b150f9c35ccb6869cbf074e48-Abstract.html)
Supplement: Supplementary file [file 52d2752b150f9c35ccb6869cbf074e48-Supplemental.zip]

---

# HyNet: Local Descriptor with Hybrid Similarity Measure

---

Anonymous Author(s) PaperID 1932

Affiliation

Address

email

## 1 Image Matching Challenge 2020

We further evaluate HyNet on the newly proposed Image Matching Challenge<sup>1</sup> (IMC) dataset [1]. It consists of two tasks, namely wide-baseline stereo and multi-view reconstruction. Since the ground truth for the test set is not released, we report the performance on the validation set. For fair comparison, we use Key.Net [2] as the detector and compare HyNet with two other state-of-the-art descriptors, HardNet [3] and SOSNet [4]. The evaluation protocol is with a maximum of 2048 keypoints per image and standard descriptor size (512 bytes). We use DEGENSAC [5] for geometric verification, and nearest-neighbour matcher with first-to-second nearest-neighbour ratio test for filtering false-positive matches. Please refer to [1] for exact details of the challenge’s settings.

|             | mAA (%)      |              |              |
|-------------|--------------|--------------|--------------|
|             | Stereo       | Multi-View   | Average      |
| HardNet [3] | 63.40        | 74.41        | 68.91        |
| SOSNet [4]  | 63.41        | 74.51        | 68.96        |
| HyNet       | <b>64.07</b> | <b>74.84</b> | <b>69.46</b> |

Table 1: Mean Average Accuracy (mAA) at 10° on IMC dataset [1].

As can be seen from Table 1, HyNet surpasses the previous state-of-the-art methods HardNet and SOSNet on both tasks, which further validates its effectiveness.

## 2 Integrating HyNet with SOSR

In this section, we test HyNet by combining it with the Second Order Similarity Regularisation (SOSR) proposed in [4], results are shown in Table 2 and Fig. 1. As shown, HyNet generalises well with the extra supervision signal from SOSR, indicating its potential of being further boosted by other third-party loss terms.

---

<sup>1</sup><https://vision.uvic.ca/image-matching-challenge/benchmark/>

| Train          | ND          | YOS         | LIB         | YOS         | LIB         | ND          | Mean        |
|----------------|-------------|-------------|-------------|-------------|-------------|-------------|-------------|
| Test           | LIB         |             | ND          |             | YOS         |             |             |
| SIFT [6]       | 29.84       |             | 22.53       |             | 27.29       |             | 26.55       |
| HardNet [3]    | 1.49        | 2.51        | 0.53        | 0.78        | 1.96        | 1.84        | 1.51        |
| SOSNet [4]     | 1.08        | 2.12        | 0.35        | 0.67        | 1.03        | 0.95        | 1.03        |
| HyNet          | <b>0.89</b> | <b>1.37</b> | 0.34        | 0.61        | 0.88        | 0.96        | 0.84        |
| HyNet+SOSR [4] | 0.91        | 1.62        | <b>0.31</b> | <b>0.54</b> | <b>0.78</b> | <b>0.73</b> | <b>0.82</b> |

Table 2: Patch verification performance on the UBC phototour dataset. Numbers denote false positive rates at 95% recall(FPR@95). ND: Notredame, LIB: Liberty, YOS: Yosemite.

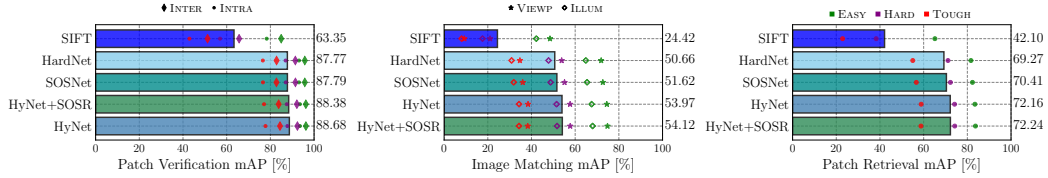

Figure 1: Results on test set ‘a’ of HPatches [7]. Colour of the marker indicates EASY, HARD, and TOUGH noise. The type of marker corresponds to the variants of the experimental settings.

## 17 References

- 18 [1] Yuhe Jin, Dmytro Mishkin, Anastasiia Mishchuk, Jiri Matas, Pascal Fua, Kwang Moo Yi, and  
19 Eduard Trulls. Image matching across wide baselines: From paper to practice. *arXiv preprint*  
20 *arXiv:2003.01587*, 2020.
- 21 [2] Axel Barroso-Laguna, Edgar Riba, Daniel Ponsa, and Krystian Mikolajczyk. Key.net: Key-  
22 point detection by handcrafted and learned cnn filters. *Proceedings of the IEEE International*  
23 *Conference on Computer Vision*, 2019.
- 24 [3] Anastasiia Mishchuk, Dmytro Mishkin, Filip Radenovic, and Jiri Matas. Working hard to know  
25 your neighbor’s margins: Local descriptor learning loss. In *Advances in Neural Information*  
26 *Processing Systems (NIPS)*, pages 4826–4837, 2017.
- 27 [4] Yurun Tian, Xin Yu, Bin Fan, Fuchao Wu, Huub Heijnen, and Vassileios Balntas. Sosnet:  
28 Second order similarity regularization for local descriptor learning. In *Proceedings of the IEEE*  
29 *Conference on Computer Vision and Pattern Recognition*, pages 11016–11025, 2019.
- 30 [5] Ondrej Chum, Tomas Werner, and Jiri Matas. Two-view geometry estimation unaffected by a  
31 dominant plane. In *CVPR*, 2005.
- 32 [6] David G Lowe. Distinctive image features from scale-invariant keypoints. *Proceedings of the*  
33 *IEEE International Conference on Computer Vision (ICCV)*, 60(2):91–110, 2004.
- 34 [7] Vassileios Balntas, Karel Lenc, Andrea Vedaldi, and Krystian Mikolajczyk. Hpatches: A  
35 benchmark and evaluation of handcrafted and learned local descriptors. In *Proceedings of the*  
36 *IEEE Conference on Computer Vision and Pattern Recognition (CVPR)*, volume 4, page 6, 2017.
